# Supplementary material for: The impact of ocular trauma during the Nepal earthquake in 2015
Source: BMC Ophthalmol. 2017 Mar 28;17:32. doi: 10.1186/s12886-017-0429-z (PMC5371192; doi:10.1186/s12886-017-0429-z)
Supplement: Additional file 1: — Is the Raw Data of Earthquake victims treated at Tilganga Institute of Ophthalmology in Kathmandu in 2015. The file includes two sheets, the Data sheet and Coding sheet. The Data Sheet includes data of each patient in terms of age, sex, address, the timing of trauma and the timing of treatment in the hospital, as well as the vision of the affected eye, laterality, management and the final vision. The Coding sheet covers the code for each parameter. The data of personal identity information will not be made available in order to protect the patients’ privacy. (XLS 38 kb) [file 12886_2017_429_MOESM1_ESM.xls]

## Sheet: Data sheet
S. No.	Address	Age	Sex	Complaint	Duration(Day)	Right Vision	Left Vision	affected Eye	Fellow eye	Laterality	Diagnosis	Managament	Surgery	Last F/U Vision in afftected eye
1	11	51	1	1	7	2	1	2	1	1	11	1		1
2	4	62	1	5	12	1	4	4	1	2	11	1		2
3	2	20	2	1	2	1	5	5	1	2	12	1		6
4	10	8	1	5	7	1	1	1	1	2	13	2	Corneal FB Removal	1
5	4	10	1	1	16	1	6	6	1	2	12	1		6
6	10	14	2	5	8	1	1	1	1	2	11	2	FB removal	1
7	4	33	2	1	5	5	1	5	1	1	5	2	Corneal Sceral + Lid Repair	6
8	12	55	2	1	12	1	1	1	1	3	1	1		1
9	1	47	1	1	10	2	6	2	6	1	9	2	PPV+MP+EL+SOI	2
10	5	15	1	1	90	2	1	2	1	1	9	3	Sectoral PRP	2
11	1	26	1	1	10	2	2	2	2	1	9	1		2
12	14	67	1	1	2	3	1	3	1	1	9	1		3
13	1	55	2	1	7	1	1	1	1	3	9	1		1
14	5	65	2	1	7	2	2	2	2	3	9	1		2
15	3	60	2	1	5	1	2	2	1	2	9	2	PPV + MP + C3F8	1
16	10	45	2	5	7	5	1	5	1	1	11	1		3
17	5	25	1	1	1	4	1	4	1	1	4	2	Corneal Repair	4
18	1	7	1	1	1	4	1	4	1	1	4	2	Corneal Repair and Lens Aspiration	5
19	5	13	2	1	2	6	1	5	1	1	5	2	Corneoscleral Repair,Vitrectomy + MP + EL + FAE	6
20	5	47	1	1	14	1	3	3	1	2	11	1		4
21	2	28	2	1	60	5	1	5	1	1	14	1		5
22	14	9	1	1	4	1	5	5	1	2	11	1		2
23	5	64	1	1	5	5	1	5	1	1	11	1		1
24	5	45	2	5	7	1	1	1	1	2	2	2	Lid Repair	1
25	11	36	1	4	2	1	1	1	1	1	3	2	Lid Repair + Minimonoka Stent	1
26	7	12	1	1	14	1	6	6	1	2	12	1		6
27	9	65	2	1	12	1	5	5	1	2	6	2	Cornea Sceral Rapir + PPV	5
28	8	49	1	1	7	5	1	5	1	1	4	2	Corneal Repair + Lensectomy + Intravitreal antibiotics	1
29	8	4	2	2	21	1	2	2	1	2	10	2	Orbital Floor Repair	2
30	1	42	1	5	1	1	1	1	1	1	15	1		1
31	1	63	2	1	120	1	4	4	1	2	9	2	PPV+EL+SOI	3
32	8	45	1	4	1	5	1	5	1	1	4	2	Corneal Repair + Intravitreal antibiotics	3
33	2	50	2	2		2	2	2	2	1	10	2	Floor+ medial wall repair	1
34	3	63	2	1	9	5	3	5	3	1	9	2	BB+PPV+EL+SOI	2
35	11	60	1	1	10	1	5	5	1	2	9	2	Phaco+PPV+EL+Injection avastin	5
36	13	20	1	1	26	5	1	5	1	1	9	2	PPV+MP+EL+SOI	5
37	6	20	1	3	30	1	1	1	1	1	13	2	FB removal	1
38	5	10 d	2	5	1	1	1	1	1	3	1	1		1
39	14	12	2	5	120	1	2	1	2	1	7	1		1
40	5	24	1	1	3	1	1	1	1	2	7	1		1
41	5	28	2	5	9	1	1	1	1	1	7	1		1
42	1	21	1	1	1	1	2	2	1	2	9	1		1
43	3	30	1	5	1	1	1	1	1	3	1	1		1
44	14	50	2	4	20	1	1	1	1	2	2	2	Lid repair	1
45	1	40	1	1	7	5	5	5	5	2	9	2	PPV+EL+SOI
46	5	43	1	5	7	1	1	1	1	2	7	1		1
47	1	38	2	1	1	1	1	1	1	1	7	1		1
48	2	32	2	1	1	1	5	5	1	2	7	1		1
49	5	34	1	5	10	1	1	1	1	1	7	1		1
50	6	75	1	1	10	1	6	6	1	2	5	2	Evisceration	6
51	5	50	2	1	1	1	1	1	1	2	7	1		1
52	3	47	1	4	8	1	3	3	1	2	7	2	Lid repair	2
53	15	40	1	5	3	1	1	1	1	1	1	1		1
54	6	5	1	5	1	1	1	1	1	1	13	2	FB removal	1
55	5	31	1	5	1	1	2	2	1	2	13	2	FB removal	1
56	11	46	2	4	5	1	1	1	1	2	2	1		1
57	4	47	1	2	18	1	1	1	1	2	10	1		1
58	8	33	1	1	2	1	2	2	1	2	4	2	Corneal Repair	4
59	14	70	2	1	25	5	1	5	1	1	9	1		5

## Sheet: Coding
Sex	Code	Address	Code	Chieft Complaint	Code	Laterality	Code	Rt Vision	Left Vision	Code	Diagnosis	Code	Systemic Involvement	Code	Management	Code
1	Male	Kathmandu	1	Blurring vision	1	Right	1	6/6 -6/18	6/6 -6/18	1	Conjunctivitis	1	Yes	1	Medical	1
2	Female	Bhaktapur	2	Diplopia	2	Left	2	6/18 - 6/60	6/18 - 6/60	2	Lid Laceration	2	NO	2	Surgical	2
		Lalitpur	3	FB Sensation	3	Bilateral	3	6/60 - 3/60	6/60 - 3/60	3	Lid Laceration with Canaliculi	3			Laser	3
		Dhading	4	Cut Injury	4		4	<3/60 -1/60		4	Open Globe I	4
		Sindupalchowk	5	Redness	5		5	<1/60 - PL		5	Open Globe II	5
		Kavre	6	Ocular Pain			6	NPL		6	Open Globe Zone III	6
		Nuwakot	7								Close Globe Zone I	7
		Rasuwa	8								Close Globe Zone II	8
		Gorkha	9								Close Globe Zone III	9
		Sarlahi	10								Orbital bone Fracture	10
		Ramechap	11								Corneal Ulcer	11
		Tanahau	12								Optic Atrophy	12
		Solukhumbhu	13								Foreign Body	13
		Dolakha	14								Post Traumatic Glaucoma	14
		Sindhuli	15								Cornal Abrasion	15
